# Supplementary material
Source: PubMed Central journal article supplement (PMC7673305)
Supplement: NIHMS1637432-supplement-Supplemental_Material.pdf [file NIHMS1637432-supplement-Supplemental_Material.pdf]

### Appendix: Cancer Type

Cancer type groups include: lung; breast; prostate; colorectal (colon and rectum); digestive system (esophagus, small intestine, anus, other biliary etc.); stomach; melanoma; Non-Hodgkins lymphoma; Hodgkins lymphoma; multiple myeloma; leukemia; oral and pharynx; respiratory (other than lung—i.e. nasal cavity, trachea, larynx etc.); female genital (includes cervical, ovarian, etc.); male genital (other than prostate); bladder; urinary system (other than bladder—i.e. kidney, renal pelvis, ureter, etc.); eye and orbital; brain and other nervous system; endocrine (i.e. thyroid, thalamus etc.); liver; pancreas; other (i.e. bones, joints, Kaposi sarcomas); and ill-defined/unknown

| Cancer Type            | ICD-O-3 code                                         | Histology codes                                                                                                                                                                                                                                                                                                                                                                                                                               |
|------------------------|------------------------------------------------------|-----------------------------------------------------------------------------------------------------------------------------------------------------------------------------------------------------------------------------------------------------------------------------------------------------------------------------------------------------------------------------------------------------------------------------------------------|
| Leukemia               | C420 C421 C424                                       | 9733 9742 9800 9801 9802<br>9803 9804 9805 9806 9807<br>9808 9809 9810 9811 9812<br>9813 9814 9815 9816 9817<br>9818 9819 9820 9823 9826<br>9827 9831 9832 9833 9834<br>9835 9836 9837 9838 9839<br>9840 9841 9842 9843 9844<br>9845 9846 9847 9848 9860<br>9861 9863 9866 9867 9871<br>9872 9873 9874 9875 9891<br>9895 9896 9897 9910 9920<br>9930 9940 9945 9946 9963<br>9964                                                              |
| Myelomas               |                                                      | 9731 9732 9734                                                                                                                                                                                                                                                                                                                                                                                                                                |
| Non Hodgkin's lymphoma | <i>Excludes C420 C421 C424</i>                       | 9590 9591 9592 9593 9594<br>9595 9596 9670 9671 9672<br>9673 9674 9675 9676 9677<br>9678 9679 9680 9681 9682<br>9683 9684 9685 9687 9688<br>9689 9690 9691 9692 9693<br>9694 9695 9696 9697 9698<br>9699 9700 9701 9702 9703<br>9704 9705 9706 9707 9708<br>9709 9710 9711 9712 9713<br>9714 9715 9716 9717 9718<br>9719 9720 9721 9722 9723<br>9724 9725 9726 9727 9728<br>9729 9811 9812 9813 9814<br>9815 9816 9817 9818 9823<br>9827 9837 |
| Lymphoma-Hodgkin's     |                                                      | 9650 9651 9652 9653 9654<br>9655 9656 9657 9658 9659<br>9660 9661 9662 9663 9664<br>9665 9666 9667                                                                                                                                                                                                                                                                                                                                            |
| Melanoma               | C440 C441 C442 C443 C444<br>C445 C446 C447 C448 C449 | 8720 8721 8722 8723 8724<br>8725 8726 8727 8728 8729<br>8730 8731 8732 8733 8734<br>8735 8736 8737 8738 8739<br>8740 8741 8742 8743 8744<br>8745 8746 8747 8748 8749<br>8750 8751 8752 8753 8754<br>8755 8756 8757 8758 8759                                                                                                                                                                                                                  |

|                                |                                                                                                                                                                                                                                                                                                                                                                          |                                                                                                                                                                              |
|--------------------------------|--------------------------------------------------------------------------------------------------------------------------------------------------------------------------------------------------------------------------------------------------------------------------------------------------------------------------------------------------------------------------|------------------------------------------------------------------------------------------------------------------------------------------------------------------------------|
|                                |                                                                                                                                                                                                                                                                                                                                                                          | 8760 8761 8762 8763 8764<br>8765 8766 8767 8768 8769<br>8770 8771 8772 8773 8774<br>8775 8776 8777 8778 8779<br>8780 8781 8782 8783 8784<br>8785 8786 8787 8788 8789<br>8790 |
| Lung Cancers                   | C340 C341 C342 C343 C348<br>C349                                                                                                                                                                                                                                                                                                                                         |                                                                                                                                                                              |
| Colon Cancers                  | C180 C181 C182 C183 C184<br>C185 C186 C187 C188 C189<br>C199 C209 C260                                                                                                                                                                                                                                                                                                   |                                                                                                                                                                              |
| Breast Cancer (female or male) | C500 C501 C502 C503 C504<br>C505 C506 C508 C509                                                                                                                                                                                                                                                                                                                          |                                                                                                                                                                              |
| Prostate Cancer                | C619                                                                                                                                                                                                                                                                                                                                                                     |                                                                                                                                                                              |
| Bladder Cancers                | C670 C671 C672 C673 C674<br>C675 C676 C677 C678 C679                                                                                                                                                                                                                                                                                                                     |                                                                                                                                                                              |
| Oral and Pharynx Cancers       | C000 C001 C002 C003 C004<br>C005 C006 C008 C009 C019<br>C020 C021 C022 C023 C024<br>C028 C029 C030 C031 C039<br>C040 C041 C048 C049 C050<br>C051 C052 C058 C059 C060<br>C061 C062 C068 C069 C079<br>C080 C081 C088 C089 C090<br>C091 C098 C099 C100 C101<br>C102 C103 C104 C108 C109<br>C110 C111 C112 C113 C118<br>C119 C129 C130 C131 C132<br>C138 C139 C140 C142 C148 |                                                                                                                                                                              |
| Other digestive cancers        | C150 C151 C152 C153 C154<br>C155 C158 C159 C160 C161<br>C162 C163 C164 C165 C166<br>C168 C169 C170 C171 C172<br>C173 C178 C179 C210 C211<br>C212 C218 C239 C240 C241<br>C242 C243 C244 C245 C246<br>C247 C248 C249 C268 C269<br>C422                                                                                                                                     |                                                                                                                                                                              |
| Other respiratory cancers      | C300 C301 C310 C311 C312<br>C313 C318 C319 C320 C321<br>C322 C323 C328 C329 C339<br>C379 C380 C381 C382 C383<br>C384 C388 C390 C398 C399                                                                                                                                                                                                                                 |                                                                                                                                                                              |
| Other Skin Cancers             | C440 C441 C442 C443 C444<br>C445 C446 C447 C448 C449                                                                                                                                                                                                                                                                                                                     |                                                                                                                                                                              |
| Other female genital cancers   | C510 C511 C512 C518 C519<br>C529 C530 C531 C538 C539<br>C540 C541 C542 C543 C548<br>C549 C559 C569 C570 C571<br>C572 C573 C574 C577 C578<br>C579 C589                                                                                                                                                                                                                    |                                                                                                                                                                              |
| Other male genital cancers     | C600 C601 C602 C608 C609<br>C620 C621 C629 C630 C631<br>C632 C637 C638 C639                                                                                                                                                                                                                                                                                              |                                                                                                                                                                              |

|                                        |                                                                                                                                                                                                                                                                                                        |                                                                                               |
|----------------------------------------|--------------------------------------------------------------------------------------------------------------------------------------------------------------------------------------------------------------------------------------------------------------------------------------------------------|-----------------------------------------------------------------------------------------------|
| Other urinary/renal/pelvis Cancers     | C649 C659 C669 C680 C681<br>C688 C689                                                                                                                                                                                                                                                                  |                                                                                               |
| Eye and Orbit Cancers                  | C690 C691 C692 C693 C694<br>C695 C696 C697 C698 C699                                                                                                                                                                                                                                                   |                                                                                               |
| Brain and other nervous system cancers | C700 C701 C709 C710 C711<br>C712 C713 C714 C715 C716<br>C717 C718 C719 C720 C721<br>C722 C723 C724 C725 C728<br>C729                                                                                                                                                                                   |                                                                                               |
| Endocrine Cancers                      | C739 C740 C741 C749 C750<br>C751 C752 C753 C754 C755<br>C758 C759                                                                                                                                                                                                                                      |                                                                                               |
| Other Cancers                          | C400 C401 C402 C403 C408<br>C409 C410 C411 C412 C413<br>C414 C418 C419 C470 C471<br>C472 C473 C474 C475 C476<br>C478 C479 C480 C481 C482<br>C488 C490 C491 C492 C493<br>C494 C495 C496 C498 C499<br>C760 C761 C762 C763 C764<br>C765 C766 C767 C768 C770<br>C771 C772 C773 C774 C775<br>C778 C779 C809 | 9741 9761 9950 9960 9961<br>9962 9965 9975 9980 9982<br>9983 9984 9985 9986 9987<br>9989 9992 |
| Liver cancers                          | C220 C221                                                                                                                                                                                                                                                                                              |                                                                                               |
| Pancreatic cancers                     | C250 C251 C252 C253 C254<br>C255 C256 C257 C258 C259                                                                                                                                                                                                                                                   |                                                                                               |
| Stomach cancers                        | C160 C161 C162 C163 C164<br>C165 C166 C168 C169                                                                                                                                                                                                                                                        |                                                                                               |
